# Supplementary material for: Neuroinflammation Is Associated with GFAP and sTREM2 Levels in Multiple Sclerosis
Source: MDPI journal article supplement (doi:10.3390/biom12020222), 2022-01-27
Supplement: s1 [file s1]

## Supplementary Materials

**Table S1:** Correlations between GFAP/TREM2 and CSF inflammatory molecules

| GFAP                          | R            | <i>p</i>         | B-H adjusted <i>p</i> | sTREM2       | R            | <i>p</i>         | B-H adjusted <i>p</i> |
|-------------------------------|--------------|------------------|-----------------------|--------------|--------------|------------------|-----------------------|
| <b>sTREM2</b>                 | <b>0.648</b> | <b>&lt;0.001</b> | <b>&lt;0.001</b>      | GFAP         | -            | -                | -                     |
| IL-1                          | 0.921        | 0.519            | 0.628                 | IL-1         | 0.143        | 0.485            | 0.587                 |
| IL-2                          | -0.129       | 0.367            | 0.543                 | IL-2         | -0.172       | 0.233            | 0.412                 |
| IL-4                          | 0.111        | 0.439            | 0.578                 | IL-4         | 0.247        | 0.081            | 0.155                 |
| <b>IL-5</b>                   | <b>0.432</b> | <b>0.002</b>     | <b>0.009</b>          | <b>IL-5</b>  | <b>0.397</b> | <b>0.004</b>     | <b>0.018</b>          |
| IL-6                          | -0.126       | 0.378            | 0.543                 | IL-6         | -0.051       | 0.722            | 0.788                 |
| IL-7                          | 0.243        | 0.086            | 0.188                 | IL-7         | 0.251        | 0.076            | 0.155                 |
| <b>IL-8</b>                   | <b>0.495</b> | <b>&lt;0.001</b> | <b>0.002</b>          | <b>IL-8</b>  | <b>0.431</b> | <b>0.002</b>     | <b>0.011</b>          |
| IL-9                          | 0.312        | 0.026            | 0.099                 | <b>IL-9</b>  | <b>0.428</b> | <b>0.002</b>     | <b>0.011</b>          |
| IL-10                         | 0.057        | 0.693            | 0.755                 | IL-10        | 0.113        | 0.443            | 0.566                 |
| IL-12                         | 0.108        | 0.452            | 0.578                 | IL-12        | 0.123        | 0.389            | 0.526                 |
| IL-13                         | 0.267        | 0.058            | 0.167                 | <b>IL-13</b> | <b>0.368</b> | <b>0.008</b>     | <b>0.031</b>          |
| IL-15                         | 0.011        | 0.937            | 0.937                 | IL-15        | 0.014        | 0.921            | 0.921                 |
| IL-17                         | 0.182        | 0.206            | 0.364                 | IL-17        | 0.138        | 0.333            | 0.495                 |
| <b>G-CSF</b>                  | <b>0.576</b> | <b>&lt;0.001</b> | <b>0.001</b>          | <b>G-CSF</b> | <b>0.576</b> | <b>&lt;0.001</b> | <b>0.001</b>          |
| GM-CSF                        | -0.169       | 0.236            | 0.388                 | GM-CSF       | -0.069       | 0.632            | 0.726                 |
| MCP1                          | 0.072        | 0.617            | 0.709                 | MCP1         | -0.029       | 0.839            | 0.877                 |
| RANTES                        | 0.275        | 0.047            | 0.164                 | RANTES       | 0.257        | 0.069            | 0.155                 |
| MIP1A                         | 0.138        | 0.845            | 0.883                 | MIP1A        | 0.294        | 0.036            | 0.118                 |
| TNF                           | 0.244        | 0.084            | 0.188                 | TNF          | 0.135        | 0.345            | 0.496                 |
| <b>IFN<math>\gamma</math></b> | <b>0.432</b> | <b>0.002</b>     | <b>0.009</b>          | IFN $\gamma$ | 0.261        | 0.065            | 0.155                 |
| IL-1ra                        | 0.185        | 0.194            | 0.364                 | IL-1ra       | 0.247        | 0.082            | 0.155                 |
| IP10                          | 0.243        | 0.087            | 0.188                 | IP10         | 0.162        | 0.256            | 0.421                 |

Abbreviations. R: Spearman's rho; *p*: *p*-value, B-H adjusted *p*: Benjamini- Hochberg adjusted *p*-value; GFAP: glial fibrillary acidic protein, sTREM2: soluble triggering receptor expressed on myeloid cells-2, IL: interleukin; G-CSF: granulocyte colony stimulating factor, GM-CSF: granulocyte macrophage colony stimulating factor; MCP1: Monocyte chemoattractant protein-1; RANTES: Regulated upon Activation, Normal T Cell Expressed and Presumably Secreted; MIP1A: Macrophage Inflammatory Proteins 1A; TNF: tumor necrosis factor; INF: interferon, ra: receptor antagonist; IP10: Interferon gamma-induced protein 10
